# Supplementary material for: Yolk sac-derived fetal macrophages suppress skin fibrosis and contribute to scarless wound healing
Source: Research Square preprint supplement (doi:10.21203/rs.3.rs-7478492/v1), 2025-09-29
Supplement: Supplementary file 1 [file 8c356bd4c12619cdd1f7c9c1.docx]

Supplementary material

Supplemental Fig. S1

Number of macrophages and granulocytes per field of view 24 h after dorsal skin wounding at E13, E15, E17, and P1.

Supplementary Fig. S2a

CD180- and CD9-positive cells among F4/80-positive cells in the adult spleen.

Supplementary Fig. S2b

Occurrence and proportions of F4/80-positive, CD180-positive, and CD9-positive cells in each organ.

Supplementary Fig. S3

Modified Mouse Masson Trichrome Scar Scale (MMTSS)

Comparison of MMTSS scores between the fetal macrophage administration group and the control group during adult dorsal skin wound healing. Data are presented as mean ± SEM (n = 3 per group). Two-sided Student’s *t*-test without correction for multiple comparisons; *P* = 0.0325.

Supplementary Table S1

Differentially enriched GO terms and KEGG pathways between E13 and E18 macrophages (*P* < 0.05).
