# Supplementary material for: Yolk sac-derived fetal macrophages suppress skin fibrosis and contribute to scarless wound healing
Source: Research Square preprint supplement (doi:10.21203/rs.3.rs-7478492/v1), 2025-09-29
Supplement: Supplementary file 2 [file 902cadecba914e8c7e173460.xlsx]

## Sheet: Sheet1
Category	GO ID	Term	Regulation (E18 vs E13)	Adjusted p-value
Biological Process	GO:0015671	oxygen transport	Down in E18	≤0.05
Biological Process	GO:0006810	transport	Down in E18	≤0.05
Biological Process	GO:0007155	cell adhesion	Down in E18	≤0.05
Biological Process	GO:0050715	positive regulation of cytokine secretion	Down in E18	≤0.05
Biological Process	GO:0007275	multicellular organism development	Down in E18	≤0.05
Biological Process	GO:0032956	regulation of actin cytoskeleton organization	Down in E18	≤0.05
Biological Process	GO:0006564	L-serine biosynthetic process	Down in E18	≤0.05
Biological Process	GO:0002215	defense response to nematode	Down in E18	≤0.05
Biological Process	GO:0006898	receptor-mediated endocytosis	Down in E18	≤0.05
Biological Process	GO:0042632	cholesterol homeostasis	Down in E18	≤0.05
Biological Process	GO:0010033	response to organic substance	Down in E18	≤0.05
Biological Process	GO:0019953	sexual reproduction	Down in E18	≤0.05
Biological Process	GO:0051291	protein hetero oligomerization	Down in E18	≤0.05
Biological Process	GO:0042060	wound healing	Down in E18	≤0.05
Biological Process	GO:0001542	ovulation from ovarian follicle	Down in E18	≤0.05
Biological Process	GO:0010628	positive regulation of gene expression	Down in E18	≤0.05
Biological Process	GO:0008406	gonad development	Down in E18	≤0.05
Biological Process	GO:0001775	cell activation	Down in E18	≤0.05
Biological Process	GO:0032693	negative regulation of interleukin-10 production	Down in E18	≤0.05
Biological Process	GO:0042744	hydrogen peroxide catabolic process	Down in E18	≤0.05
Biological Process	GO:0002376	immune system process	Up in E18	≤0.05
Biological Process	GO:0050729	positive regulation of inflammatory response	Up in E18	≤0.05
Biological Process	GO:0051607	defense response to virus	Up in E18	≤0.05
Biological Process	GO:0045087	innate immune response	Up in E18	≤0.05
Biological Process	GO:0006954	inflammatory response	Up in E18	≤0.05
Biological Process	GO:0009615	response to virus	Up in E18	≤0.05
Biological Process	GO:0006955	immune response	Up in E18	≤0.05
Biological Process	GO:0046785	microtubule polymerization	Up in E18	≤0.05
Biological Process	GO:0019886	antigen processing and presentation of exogenous peptide antigen via MHC class II	Up in E18	≤0.05
Biological Process	GO:0030593	neutrophil chemotaxis	Up in E18	≤0.05
Biological Process	GO:0090023	positive regulation of neutrophil chemotaxis	Up in E18	≤0.05
Biological Process	GO:0048247	lymphocyte chemotaxis	Up in E18	≤0.05
Biological Process	GO:0070374	positive regulation of ERK1 and ERK2 cascade	Up in E18	≤0.05
Biological Process	GO:0009991	response to extracellular stimulus	Up in E18	≤0.05
Biological Process	GO:0048002	antigen processing and presentation of peptide antigen	Up in E18	≤0.05
Biological Process	GO:0038165	oncostatin-M-mediated signaling pathway	Up in E18	≤0.05
Biological Process	GO:0006935	chemotaxis	Up in E18	≤0.05
Biological Process	GO:0016049	cell growth	Up in E18	≤0.05
Biological Process	GO:0060337	type I interferon signaling pathway	Up in E18	≤0.05
Biological Process	GO:0019882	antigen processing and presentation	Up in E18	≤0.05
Biological Process	GO:0070098	chemokine-mediated signaling pathway	Up in E18	≤0.05
Biological Process	GO:0001525	angiogenesis	Up in E18	≤0.05
Biological Process	GO:0097066	response to thyroid hormone	Up in E18	≤0.05
Biological Process	GO:0001867	complement activation, lectin pathway	Up in E18	≤0.05
Biological Process	GO:0007155	cell adhesion	Up in E18	≤0.05
Biological Process	GO:0002504	antigen processing and presentation of peptide or polysaccharide antigen via MHC class II	Up in E18	≤0.05
Biological Process	GO:0006919	activation of cysteine-type endopeptidase activity involved in apoptotic process	Up in E18	≤0.05
Biological Process	GO:0071346	cellular response to interferon-gamma	Up in E18	≤0.05
Biological Process	GO:0006957	complement activation, alternative pathway	Up in E18	≤0.05
KEGG Pathway	mmu04640	Hematopoietic cell lineage	Down in E18	≤0.05
KEGG Pathway	mmu05310	Asthma	Down in E18	≤0.05
KEGG Pathway	mmu05168	Herpes simplex infection	Up in E18	≤0.05
KEGG Pathway	mmu04380	Osteoclast differentiation	Up in E18	≤0.05
KEGG Pathway	mmu05150	Staphylococcus aureus infection	Up in E18	≤0.05
KEGG Pathway	mmu05164	Influenza A	Up in E18	≤0.05
KEGG Pathway	mmu05152	Tuberculosis	Up in E18	≤0.05
KEGG Pathway	mmu05162	Measles	Up in E18	≤0.05
KEGG Pathway	mmu04145	Phagosome	Up in E18	≤0.05
KEGG Pathway	mmu05160	Hepatitis C	Up in E18	≤0.05
KEGG Pathway	mmu04630	Jak-STAT signaling pathway	Up in E18	≤0.05
KEGG Pathway	mmu04514	Cell adhesion molecules (CAMs)	Up in E18	≤0.05
KEGG Pathway	mmu05145	Toxoplasmosis	Up in E18	≤0.05
KEGG Pathway	mmu04062	Chemokine signaling pathway	Up in E18	≤0.05
